# Supplementary material for: Innate immunity mediated longevity and longevity induced by germ cell removal converge on the C-type lectin domain protein IRG-7
Source: PLoS Genet. 2017 Feb 14;13(2):e1006577. doi: 10.1371/journal.pgen.1006577 (PMC5308781; doi:10.1371/journal.pgen.1006577)
Supplement: S1 Table — (XLSX) [file pgen.1006577.s003.xlsx]

## Sheet: fig 1 - S1-Table
Lifespan analysis of irg-7(zc6) mutants upon inactivation of ER-stress associated genes
Cox Regresion P value compared to the N2-irg-7(zc6) pair	comments	Mantel-Cox P- value relative to control	% lifespan extension by irg-7(zc6)	mean lifespan (days)	strain
*	Fig. 1b			14	N2
	Fig. 1b	<0.0001	1.31	18.6	irg-7(zc6)
0.611				13.4	pek-1(ok275)
		<0.0001	1.2	16.2	pek-1(ok275); irg-7(zc6)
0.735				14.1	atf-6(ok551)
		<0.0001	1.25	17.7	atf-6(ok551); irg-7(zc6)
*				15.2	N2
		<0.0001	1.27	19.3	irg-7(zc6)
0.359				14.2	pek-1(ok275)
		<0.0001	1.28	18.2	pek-1(ok275); irg-7(zc6)
0.443				14.1	atf-6(ok551)
		<0.0001	1.27	17.9	atf-6(ok551); irg-7(zc6)
	Fig. 1b			14.5	N2
	Fig. 1b	<0.0001	1.27	18.45	irg-7(zc6)
0.285	Fig. 1b			14.1	pek-1(ok275)
	Fig. 1b	<0.0001	1.21	17.1	pek-1(ok275); irg-7(zc6)
0.541	Fig. 1b			15.3	atf-6(ok551)
	Fig. 1b	<0.0001	1.23	18.9	atf-6(ok551); irg-7(zc6)
*	Fig. 1b			17.1	N2 (control RNAi)
	Fig. 1b	0.0009	1.18	20.2	irg-7(zc6) (control RNAi)
0.416	Fig. 1b			14.6	N2 (ire-1 RNAi)
	Fig. 1b	0.0008	1.15	16.8	irg-7(zc6) (ire-1 RNAi)
0.477				14.8	N2 (xbp-1 RNAi)
		0.004	1.12	16.6	irg-7(zc6) (xbp-1 RNAi)
ND				18.6	N2 (control RNAi)
		<0.0001	1.24	23.01	irg-7(zc6) (control RNAi)
				15.9	N2 (ire-1 RNAi)
		<0.0001	1.32	21.1	irg-7(zc6) (ire-1 RNAi)
				15.5	N2 (xbp-1 RNAi)
		<0.0001	1.25	19.5	irg-7(zc6) (xbp-1 RNAi)
*				16.2	N2 (control RNAi)
		<0.0001	1.26	20.4	irg-7(zc6) (control RNAi)
0.351				15.7	N2 (ire-1 RNAi)
		<0.0001	1.28	20.1	irg-7(zc6) (ire-1 RNAi)
0.941				16.5	N2 (xbp-1 RNAi)
		<0.0001	1.2	19.9	irg-7(zc6) (xbp-1 RNAi)
					Each boxed panel within the tables includes lifespan data of experiments performed in parallel.
					Statistical analysis and comparisons were done within each panel.
					Lifespan experiments were carried out at 20 °C .
