# Supplementary material for: Innate immunity mediated longevity and longevity induced by germ cell removal converge on the C-type lectin domain protein IRG-7
Source: PLoS Genet. 2017 Feb 14;13(2):e1006577. doi: 10.1371/journal.pgen.1006577 (PMC5308781; doi:10.1371/journal.pgen.1006577)
Supplement: S4 Table — (XLSX) [file pgen.1006577.s006.xlsx]

## Sheet: fig 4 - S4_Table
irg-7 improves pathogen resistance via the PMK-1/ATF-7 innate immunity pathway
comments	p- value relative to control	% lifespan extension by irg-7(zc6)	mean lifespan	strain
Fig. 4b			14.9	N2 (control RNAi)
Fig. 4b	<0.0001	1.2953	19.3	irg-7(zc6) (control RNAi)
Fig. 4b			15.2	N2 (atf-7 RNAi)
Fig. 4b	0.07	1.07237	16.3	irg-7(zc6) (atf-7 RNAi)
			15.5	N2 (control RNAi)
	<0.0001	1.26452	19.6	irg-7(zc6) (control RNAi)
			15.6	N2 (atf-7 RNAi)
	0.09	1.03846	16.2	irg-7(zc6) (atf-7 RNAi)
			14.7	N2 (control RNAi)
	<0.0001	1.27891	18.8	irg-7(zc6) (control RNAi)
			14.5	N2 (atf-7 RNAi)
	0.06	1.04828	15.2	irg-7(zc6) (atf-7 RNAi)
Fig. 4c			4.11	atf-7(-) (HB bacteria)
Fig. 4c	0.9	1.0146	4.17	atf-7(-) ; irg-7(zc6)(HB bacteria)
Fig. 4c			4.7	N2 (HB bacteria)
Fig. 4c	<0.0001	1.23404	5.8	irg-7 (zc6) (HB bacteria)
			4.6	atf-7(-) (HB bacteria)
	0.4	1.04348	4.8	atf-7(-) ; irg-7(zc6)(HB bacteria)
			4.9	N2 (HB bacteria)
	<0.0001	1.22449	6	irg-7 (zc6) (HB bacteria)
			8.4	atf-7(-) (HB bacteria)
	0.46	1.05952	8.9	atf-7(-) ; irg-7(zc6)(HB bacteria)
			11	N2 (HB bacteria)
	0.015	1.1	12.1	irg-7 (zc6) (HB bacteria)
			14.9	N2 (control RNAi)
	<0.0001	1.2953	19.3	irg-7(zc6) (control RNAi)
			15.2	N2 (pmk-1 RNAi)
	0.7	1.04605	15.9	irg-7(zc6) (pmk-1 RNAi)
			15.3	N2 (control RNAi)
	<0.0001	1.27451	19.5	irg-7(zc6) (control RNAi)
			15.6	N2 (pmk-1 RNAi)
	0.24	1.03846	16.2	irg-7(zc6) (pmk-1 RNAi)
			14.7	N2 (control RNAi)
	<0.0001	1.27891	18.8	irg-7(zc6) (control RNAi)
			14.1	N2 (pmk-1 RNAi)
	0.8	1.07092	15.1	irg-7(zc6) (pmk-1 RNAi)
				Each boxed panel within the tables includes lifespan data of experiments performed in parallel.
				Statistical analysis and comparisons were done within each panel.
				For Hb bacteria experiments, animals were grown on OP50 until day 1 of adulthood and shifted to Hb bacteria henceforth.
